# Supplementary material
Source: HighWire-hosted journal article supplement (http://erj.ersjournals.com/highwire/filestream/113043/field_highwire_adjunct_files/0/Online_Supplement.pdf)
Supplement: Online_Supplement.pdf [file Online_Supplement.pdf]

Online Table O1 Baseline Characteristics of study sample and comparison with all eligible participants

| Baseline Characteristic                                 | I<br>Methacholine<br>test at follow-up,<br>complete<br>covariate data<br>& no asthma<br>medication<br>(n=3005) | II<br>Only baseline<br>methacholine<br>test, although<br>eligible for<br>testing at<br>follow-up<br>(n=3127)* | III<br>Only baseline<br>spirometry, but no<br>methacholine test<br>due to technical<br>problems, refusal<br>or medical<br>exclusion<br>(n=2084)* | p-Value<br>comparing<br>I and II** | p-Value<br>comparing<br>I and III** |
|---------------------------------------------------------|----------------------------------------------------------------------------------------------------------------|---------------------------------------------------------------------------------------------------------------|--------------------------------------------------------------------------------------------------------------------------------------------------|------------------------------------|-------------------------------------|
| Female sex (%)                                          | 49.1                                                                                                           | 50.7                                                                                                          | 55.9                                                                                                                                             | 0.219                              | <0.001                              |
| Age (mean/sd)                                           | 39.1 / 11                                                                                                      | 40.3 / 11.9                                                                                                   | 44.1 / 11.6                                                                                                                                      | <0.001                             | <0.001                              |
| Phadiatop test (%)                                      | 29.4                                                                                                           | 28.7                                                                                                          | 28.2                                                                                                                                             | 0.564                              | 0.397                               |
| Exposure to ETS never smoker (%)                        | 13.2                                                                                                           | 13.3                                                                                                          | 12.5                                                                                                                                             | 0.993                              | 0.415                               |
| Exposure to ETS ex-smoker (%)                           | 6.9                                                                                                            | 7.6                                                                                                           | 7.9                                                                                                                                              | 0.292                              | 0.192                               |
| BMI in kg/m <sup>2</sup> (median/1st/3rd quartile)      | 23.0 / 21 / 25                                                                                                 | 23.4 / 21.2 / 26.2                                                                                            | 23.8 / 21.4 / 26.8                                                                                                                               | 0.01                               | <0.001                              |
| Current smoking (%)                                     | 28.3                                                                                                           | 37.5                                                                                                          | 34.1                                                                                                                                             | <0.001                             | <0.001                              |
| Ex-smoking (%)                                          | 23.5                                                                                                           | 21.6                                                                                                          | 22.6                                                                                                                                             | 0.088                              | 0.442                               |
| Packyears (median/1st/3rd quartile)                     | 11.4 / 4 / 23                                                                                                  | 14 / 5.2 / 27.9                                                                                               | 17.0 / 6.0 / 32.8                                                                                                                                | <0.001                             | <0.001                              |
| FEV1 in litres (median/1st/3rd quartile)                | 3.7 / 3.1 / 4.3                                                                                                | 3.5 / 3 / 4.2                                                                                                 | 3.1 / 2.6 / 3.7                                                                                                                                  | <0.001                             | <0.001                              |
| FEF <sub>25-75</sub> in ml/sec(median/1st/3rd quartile) | 3.5 / 2.7 / 4.4                                                                                                | 3.4 / 2.7 / 4.3                                                                                               | 2.9 / 2.0 / 3.8                                                                                                                                  | <0.001                             | <0.001                              |
| FVC in litres (median/1st/3rd quartile)                 | 4.6 / 3.9 / 5.4                                                                                                | 4.4 / 3.7 / 5.2                                                                                               | 4.1 / 3.5 / 4.9                                                                                                                                  | <0.001                             | <0.001                              |
| Doctor's diagnosed asthma (%)                           | 3.7                                                                                                            | 6.6                                                                                                           | 7.9                                                                                                                                              | <0.001                             | <0.001                              |
| Being hyper-reactive (%)                                | 12.9                                                                                                           | 18.2                                                                                                          | 24.9                                                                                                                                             | <0.001                             | <0.001                              |
| Reactivity slope (median/1st/3rd quartile)              | 1.0 / 0.6 / 1.7                                                                                                | 1.08 / 0.59 / 1.96                                                                                            |                                                                                                                                                  | <0.001                             |                                     |
| Wheezing without cold in the last year(%)               | 4.4                                                                                                            | 8.1                                                                                                           | 11.2                                                                                                                                             | <0.001                             | <0.001                              |
| Chronic cough (%)                                       | 3.0                                                                                                            | 5.2                                                                                                           | 7.5                                                                                                                                              | <0.001                             | <0.001                              |

\* smaller sample sizes for packyears because relating to ever-smokers (n=1794 in group II, n=1130 in group III)

\*\* T-tests for means, Wilcoxon rank sum tests for medians, Chi-2 tests for proportions

Online table O2 Airway hyper-reactivity at baseline and follow-up examination

| Baseline Examination       | Follow-up Examination |                |             |
|----------------------------|-----------------------|----------------|-------------|
|                            | normoreactive         | hyper-reactive | Total       |
| <b>normoreactive n(%)</b>  | 2684 (93.2)           | 195 (6.8)      | 2879        |
| <i>% of total</i>          | 79.9                  | 5.8            | 85.7        |
| <b>hyper-reactive n(%)</b> | 255 (53.2)            | 224 (46.8)     | 479         |
| <i>% of total</i>          | 7.6                   | 6.7            | <b>14.3</b> |
| <b>Total n(%)</b>          | 2939 (87.5)           | 419 (12.5)     | 3358        |

***p<sub>McNemar</sub>=0.0054***

**Online table O3 Influence of adjustment for lung function on effect estimates for change in bronchial reactivity slope of other model covariates**

| <b>Covariate</b>                                 | <b>Main Model<sup>1)</sup></b><br>% change in<br>b.r. slope<br>(95%-CI) | <b>Model with<br/>absolute<br/>change<sup>2)</sup></b><br>%-change in<br>b.r. slope<br>(95%-CI) | <b>Model without<br/>lung function<br/>variables<sup>3)</sup></b><br>%-change in<br>b.r. slope<br>(95%-CI) | <b>Model with %-<br/>predicted lung<br/>function and<br/>change<sup>4)</sup></b><br>%-change in<br>b.r. slope<br>(95%-CI) |
|--------------------------------------------------|-------------------------------------------------------------------------|-------------------------------------------------------------------------------------------------|------------------------------------------------------------------------------------------------------------|---------------------------------------------------------------------------------------------------------------------------|
|                                                  | <b>-3.9</b>                                                             | <b>-10.9</b>                                                                                    | <b>-13.1*</b>                                                                                              | <b>-13.8*</b>                                                                                                             |
| <b>Female sex</b>                                | (-21.1 to 16.9)                                                         | (-27.8 to 9.9)                                                                                  | (-21.5 to -3.7)                                                                                            | (-22.4 to -4.2)                                                                                                           |
| <b>Age (centered<br/>at 40 years)</b>            | <b>0.9*</b><br>(0.4 to 1.5)                                             | <b>0.6</b><br>(-0.1 to 1.2)                                                                     | <b>0.8*</b><br>(0.3 to 1.3)                                                                                | <b>0.7*</b><br>(0.2 to 1.3)                                                                                               |
| <b>Age(centered at 40<br/>years) squared</b>     | <b>0.05*</b><br>(0.01 to 0.09)                                          | <b>0.05*</b><br>(0.01 to 0.09)                                                                  | <b>0.04*</b><br>(0.00 to 0.08)                                                                             | <b>0.04*</b><br>(0.00 to 0.08)                                                                                            |
| <b>ETS in never<br/>smokers</b>                  | <b>-1.0</b><br>(-16.0 to 16.7)                                          | <b>-0.3</b><br>(-15.5 to 17.6)                                                                  | <b>-1.0</b><br>(-16.0 to 16.7)                                                                             | <b>-1.0</b><br>(-16.0 to 16.7)                                                                                            |
| <b>ETS in ex-smokers</b>                         | <b>10.7</b><br>(-10.1 to 36.3)                                          | <b>8.6</b><br>(-11.8 to 33.7)                                                                   | <b>10.3</b><br>(-10.4 to 35.8)                                                                             | <b>9.5</b><br>(-11.1 to 34.8)                                                                                             |
| <b>Atopy</b>                                     | <b>-6.3</b><br>(-15.8 to 4.2)                                           | <b>-6.7</b><br>(-16.1 to 3.8)                                                                   | <b>-6.5</b><br>(-16.0 to 4.1)                                                                              | <b>-7.2</b><br>(-16.6 to 3.2)                                                                                             |
| <b>BMI (centered at<br/>25 kg/m<sup>2</sup>)</b> | <b>-0.1</b><br>(-1.6 to 1.4)                                            | <b>-0.1</b><br>(-1.6 to 1.5)                                                                    | <b>-0.2</b><br>(-1.6 to 1.3)                                                                               | <b>-0.1</b><br>(-1.6 to 1.4)                                                                                              |
| <b>Change** in<br/>centered BMI</b>              | <b>2.7*</b><br>(0.3 to 5.2)                                             | <b>2.4</b><br>(0.0 to 4.9)                                                                      | <b>2.7*</b><br>(0.3 to 5.2)                                                                                | <b>2.5*</b><br>(0.1 to 4.9)                                                                                               |
| <b>Smoking</b>                                   | <b>21.2*</b><br>(7.5 to 36.7)                                           | <b>19.1*</b><br>(5.4 to 34.6)                                                                   | <b>21.0*</b><br>(7.3 to 36.5)                                                                              | <b>19.2*</b><br>(5.5 to 34.6)                                                                                             |
| <b>Ex-smoking</b>                                | <b>-5.1</b><br>(-18.2 to 10.1)                                          | <b>-4.7</b><br>(-17.9 to 10.6)                                                                  | <b>-4.8</b><br>(-17.9 to 10.4)                                                                             | <b>-5.3</b><br>(-18.4 to 9.8)                                                                                             |
| <b>FEV1 percent<br/>predicted</b>                |                                                                         |                                                                                                 |                                                                                                            | <b>-0.1</b><br>(-0.8 to 0.6)                                                                                              |
| <b>Change** in FEV1<br/>percent predicted</b>    |                                                                         |                                                                                                 |                                                                                                            | <b>-1.2*</b><br>(-2.1 to -0.4)                                                                                            |
| <b>FVC percent<br/>predicted</b>                 |                                                                         |                                                                                                 |                                                                                                            | <b>0.2</b><br>(-0.4 to 0.9)                                                                                               |
| <b>Change** FVC<br/>percent predicted</b>        |                                                                         |                                                                                                 |                                                                                                            | <b>0.4</b><br>(-0.4 to 1.2)                                                                                               |

b.r. slope: bronchial reactivity slope, defined as percent change in FEV1 per  $\mu\text{mol}$  methacholine

<sup>1)</sup> Estimates from a mixed linear model and adjusted for all covariates with estimates in the table plus baseline FEV1 (centered at 3.5L), baseline FVC (centered at 5L), baseline FEF<sub>25-75</sub> (adjusted for sex and FEV1 and centered at its mean). presence of concurrent colds at both examinations, seasonal terms, and random effects for area

<sup>2)</sup> Model with all covariates from model 1 plus change in centered FEV1, FVC and FEF<sup>25-75</sup> variables (calculated as follow-up minus baseline value)

<sup>3)</sup> Model including just the covariates with estimates in the table

<sup>4)</sup> Model including covariates as listed in the table and adjustment for FEV1 and FVC %-predicted (using ECTS prediction equations) and change in %-predicted values (calculated as follow-up minus baseline value)

\* significant at 5% threshold

\*\* change was calculated as follow-up minus baseline value
